# Supplementary material for: A Comparative Study of Replication-Incompetent and -Competent Adenoviral Therapy-Mediated Immune Response in a Murine Glioma Model
Source: PubMed Central journal article supplement — Mol Ther Oncolytics. 2017 May 6;5:97–104. doi: 10.1016/j.omto.2017.05.001 (PMC5443908; doi:10.1016/j.omto.2017.05.001), 2017-05-06

**OMTO, Volume 5**

**Supplemental Information**

**A Comparative Study of Replication-Incompetent  
and -Competent Adenoviral Therapy-Mediated  
Immune Response in a Murine Glioma Model**

**Julius W. Kim, Jason Miska, Jacob S. Young, Aida Rashidi, J. Robert Kane, Wojciech K. Panek, Deepak Kanojia, Yu Han, Irina V. Balyasnikova, and Maciej S. Lesniak**

**Supplemental Figure S1. Survival analysis in immunocompetent and immunodeficient murine glioma models treated with PBS.** Immunocompetent or immunodeficient mice bearing intracranial GL261-OVA were treated intracranially (*i.c.*) with PBS. 5 days after tumor implantation, Kaplan-Meier survival curves of treated mice were calculated.

**Supplemental Figure S2. Validation of the specificity SIINFEKL-H(2)<sup>k<sup>b</sup></sup> tetramer staining.** In A, representative gating of a mouse bearing GL261-OVA tumors stained with SIINFEKL-H(2)<sup>k<sup>b</sup></sup> tetramer (top panel) or fluorescence minus one (FMO) controls (bottom panel). In B, tetramer staining of sOT1 splenocytes as a positive control for tetramer staining.

**Supplemental Figure S3. Correlation of intratumoral CD103<sup>+</sup> dendritic cells to antigen specific CD8 in the draining lymph nodes of GL261-OVA glioma bearing mice.** A comparison of total numbers of CD103<sup>+</sup> DC in the Tumors of mice and total number of Tetramer<sup>+</sup> CD8 in the draining lymph nodes of the same animals. A two-tailed Pearson Correlation was performed to determine significance. \*\*,  $p < 0.01$ .

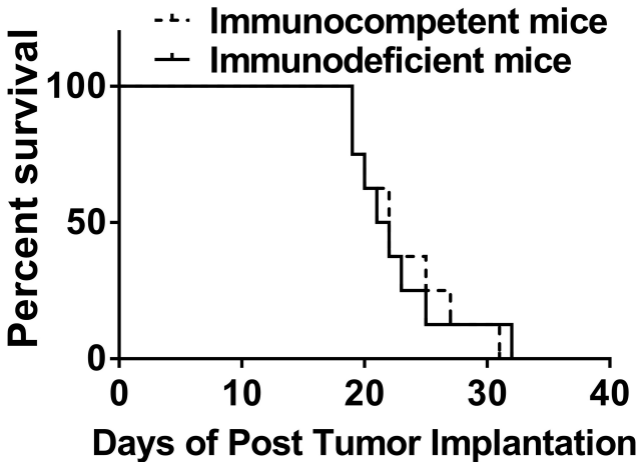

**A.****GL261-OVA****FMO**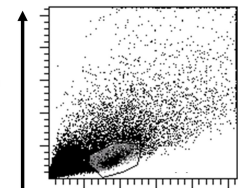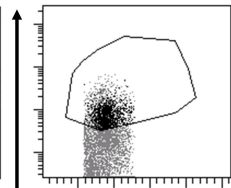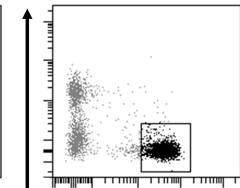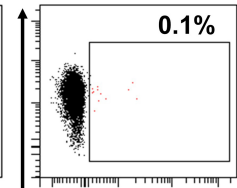**GL261-OVA****SSC-A**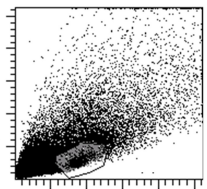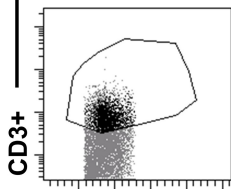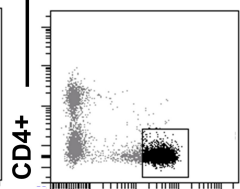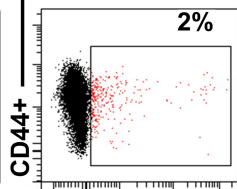**B.****OT1**  
**Splenocytes****FMO**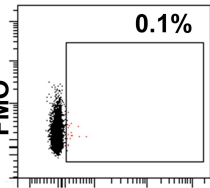**OT1**  
**Splenocytes**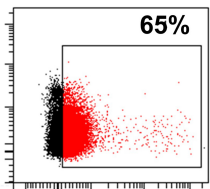

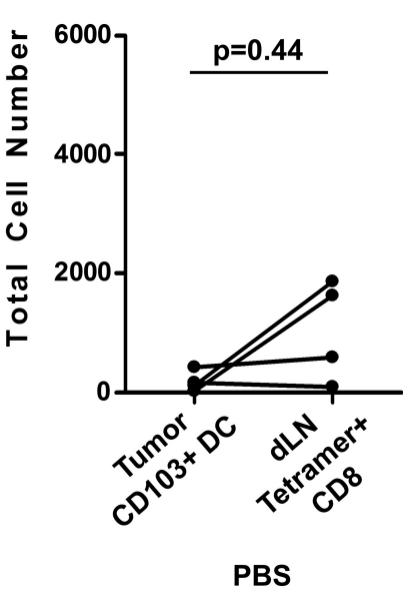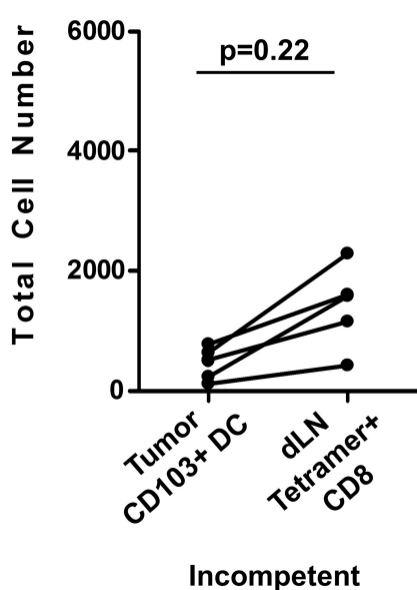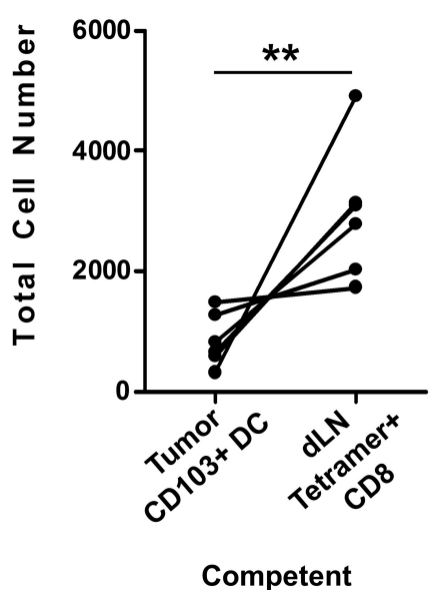

Supplement: mmc1.pdf [file mmc1.pdf]
